# Supplementary material for: Conserved Functions of Yeast Genes Support the Duplication, Degeneration and Complementation Model for Gene Duplication
Source: Oxford University Press journal article supplement (doi:10.1534/genetics.105.044057), 2005-06-19
Supplement: vanhoof_044057_supl_info.doc [file vanhoof_044057_supl_info.doc]

Supplementary information:

*S. cerevisiae* and *S. kluyveri* proteins were aligned using ClustalW (<http://www.ebi.ac.uk/clustalw/>) using the default parameters. * indicates amino acid residues that are identical between the *S.kluyveri* protein and at least one of the *S. cerevisiae* proteins.

Orc1 MAKTLKDLQGWEIITTDEQGNIIDGGQKRLRRR-------GAKTEHYLKRSSDGIKLGRG 53

** ** ** ***** ** ** ** * * * ** * ** * *

Sk MAETLIDLNGWEIIKTDDKGNLIDESQMFRRSRRRAREEAGGREHVYLQREKDGLRIGCG 60

** ** ** ** * *** * ** * * * * * * *** * *

Sir3 MAKTLKDLDGWQVIITDDQGRVIDDNNRRRSRK-------RGGENVFLKRISDGLSFGKG 53

Orc1 DSVVMHNEAAGTYSVYMIQELRLNTLNNVVELWALTYLRWFEVNPLAHYRQFNPDANILN 113

****** * * *** * ******* ***** ********* * * *

Sk DSVVMHESISKTFSIYMIHEIRLNTLNHIVELWAFSYLRWFEVNPSEYYSQYEPQVLRGD 120

** * * * ********** ** * ******** * ** * * *

Sir3 ESVIFNDNVTETYSVYLIHEIRLNTLNNVVEIWVFSYLRWFELKPKLYYEQFRPDLIKED 113

Orc1 RPLNYYNKLFSETANKNELYLTAELAELQLFNFIRVANVMDGSKWEVLKGNVDPER-DFT 172

* * ** ** * *** ** * * ** * * * *

Sk QPTEFYAEKFSNDTNKHEIYLTPELSEIYLKNFLDKATILDDQEFSNSSLTSGTEKNVFL 180

* *** ** * ** * *** ***** ** * ** ** **

Sir3 HPLEFYKDKFFNEVNKSELYLTAELSEIWLKDFIAVGQILPESQWNDSSIDKIEDR-DFL 172

Orc1 VRYICEPTGEKFVDINIEDVKAYIKKVEPREAQEYLKDLTLPS--KKKEIKRGPQK---- 226

* *** * * * * * *** * * ** *

Sk VTRACEPQGANFASIDIHSFSSMVSNSTPKVSETYLKRITADSVVQCRKSRSGPRKSPSA 240

* **** * *** * ** * **** *

Sir3 VRYACEPTAEKFVPIDIFQIIRRVKEMEPKQSDEYLKRVSVPVSGQKTNRQVMHKMGVER 232

Orc1 ---------------------KDKATQTAQISDAETR--------------------ATD 245

** * **

Sk RVKESTDSPSPCKMKKESETLKDCMGEIANSLSSKTRNSRSRAMRQSVVSMPSGEESMAN 300

* * * * * * *

Sir3 SSKRLAKKPSMKKIKIEPSADDDVNNGNIPSQRGTSTTHG----------------SISP 276

Orc1 ITDNE------------------------DGNEDES--------SDYESPSDIDVSEDMD 273

* ** * * ** * * *

Sk VKDEKGKNSPKSRNPSTGSGTDGNMEALADGKKEEATLSEHTPRSKSEEKSDRTKSSDRD 360

* * ** * ** * ** **

Sir3 QEESVSPNISSASPSALTSPTDSSKILQKRSISKELIVSEEIPINSSEQESDYEPNNETS 336

Orc1 -------SG---------------------EISADELEEEEDEEEDEDEEEKEARHTNSP 305

** * * * * * *** *

Sk EEQKLVASGPGKNEYLDKNVGDSVESTSRKDIEDRESDNDDDDEDDDDEEDGEDDDDDDD 420

* * * * ** *

Sir3 VLSSKPGSKPEKTSTELVDGRENFVYANNPEVSDDGGLEEETDEVSSESSDEAIIPVN-- 394

Orc1 RKRGRKIKLGKDDIDASVQPPPKKRGRKPKDPSKPRQMLLISSCRANN-----TP----- 355

** * ** * **

Sk DDEVDDDDEVDDDEDEDLYLTSRKRTRQKGSRGRPKKSSRLSPSVPSTPKKQQTPRMGTP 480

* * * *

Sir3 KRRGAHGSELSSKIRKIHIQETQEFSKNYTTETDNEMNGNGKPGIPRGNTKIHSMNENPT 454

Orc1 ----VIRKFTKKNVARAKKKYTPFSKRFKSIAAIPDLTSLPEFYGNSSELMASRFENKLK 411

* * **** **** ********* ***** * * * ****

Sk AIGSMIKKYTKKNVSRAKKAYTPFSKRFKRPEDIPDLTKLAEFNQGQMDLDIAAIENKLR 540

* * ** * ** * * ** * * *

Sir3 PEKGNAKMIDFATLSKLKKKYQIILDRFAPDNQVTDSSQLNKLTDEQSSLDVAGLEDKFR 514

Orc1 TTQKHQIVETIFSKVKKQLNSSYVKEEILKSANFQDYLPARENEFASIYLSAYSAIESDS 471

* ********* ** * * ** * ** **************** **

Sk SPKKAETVETIFSKVKRQLYTSHGKDEIVKSTNFDDYLPARENEFASIYLSLYSAVEAGT 600

*** * * * * * * *

Sir3 KACSSSGRETILSNFNADIN---LEESIRESLQKRELLKSQVEDFTRIFLPIYDSLMSSQ 571

Orc1 ATTIYVAGTPGVGKTLTVREVVKELLSSSAQREIPDFLYVEINGLKMVKPTDCYETLWNK 531

** ********************** ** * * * * * ************ ** ****

Sk GTTVYVAGTPGVGKTLTVREVVKELLQSAEQKELPKFQYIEINGLKMVKPTDSYEVLWNK 660

* * * * ** * **** * ** * * ** *

Sir3 NKLFYITNADDSTKFQLVNDVMDELITSSARKELPIFDYIHIDALELAGMDALYEKIWFA 631

Orc1 VSGERLTWAASMESLEFYFKRVPKNKKKTIVVLLDELDAMVTKSQDIMYNFFNWTTYENA 591

***** * ******** *** ** ********* ****** ********** **

Sk ISGERLTSGAAMESLEFYFNKVPKTKKRPVVVLLDELDALVTKSQDVMYNFFNWTTYSNA 720

** * * * ** *** ** * * * * *

Sir3 ISKENLCGDISLEALNFYITNVPKAKKRKTLILIQNPENLLS--EKILQYFEKWISSKNS 689

Orc1 KLIVIAVANTMDLPERQLGNKITSRIGFTRIMFTGYTHEELKNIIDLRLKGLNDSFFYVD 651

******************** ****************** ** *************

Sk KLIVIAVANTMDLPERQLGNKVSSRIGFTRIMFTGYTHEELKSIINFRLKGLNDSFFYVD 780

** * * * * ** * ** * *** * *

Sir3 KLSIICVGGHNVTIREQINIMPSLKAHFTEIKLNKVDKNELQQMIITRLKSLLKPFHVKV 749

Orc1 TKTGNAILIDAAGNDTTVKQTLPEDVRKVRLRMSADAIEIASRKVASVSGDARRALKVCK 711

* * **** * ** ****** ************ **

Sk IASGSAHIAVDG----ETPNFDIEGTKKVRLKISDDAVEIASRKIASVSGDARRALKACK 836

* ** * * * *

Sir3 NDKKEMTIYNNIRE--GQNQKIPDNVIVINHKINNKITQLIAKNVANVSGSTEKAFKICE 807

Orc1 RAAEIAEKHYMAKHGYGYDGKTVIEDENEEQIYDDEDKDLIESNKAKDDNDDDDDNDGVQ 771

** **** ** ******** * * * * * *

Sk RAVEIAENDYMRKHGYGYDGE-----------------------KITDPNKVDNDGDEFQ 873

**** * ** * *

Sir3 AAVEISKKDFVRKGGLQ-----------------------------------KGKLVVSQ 832

Orc1 TVHITHVMKALNETLNSHVITFMTRLSFTAKLFIYALLNLMKKNGSQEQELGDIVDEIKL 831

** * * ******* ** * ****** *** ** * * * ** *** ******** *

Sk TVEISHIMKALNETVNSPTTVFITRLSFTGKLFLYAMLSLIKRNGIQEQPLGDIVDEIRL 933

* * * *** *

Sir3 EMVPRYFSEAINGFKDETISKKIIGMSLLMRTFLYTLAQETEGTNRHTLALETVLIKMVK 892

Orc1 LIEVNGSNKFVMEIAKTLFQQGSDNI-SEQLRIISWDFVLNQLLDAGILFKQTMKNDRIC 890

** *** *** * ** * **** ** *** **** ** **

Sk LIDVNGKNKFIVEMNRVLFNQNTPLN-EEQLRVVSWEYIINQLVEAGILIKQNLKNERVS 992

* * * * * ** * **

Sir3 MLRDNPGYKASKEIKKVICGAWEPAITIEKLKQFSWISVVNDLVGEKLVVVVLEEPSASI 952

Orc1 CVKLNISVEEAKRAMNEDETLRNL--- 914

***** * ** ** * *

Sk AIKLNISFEDVLRAVEQDEVLKTL--- 1016

* * * **

Sir3 MVELKLPLEINY-AFSMDEEFKNMDCI 978

Snf12 MSKVMKPSNGKGSRKSSKAATPDTKNFFHAKKKDPVNQDKANNASQITPTVPHSHPSDMV 60

* * ** * * * * * * *

Sk MQREMT------SR--PRNLSTDMQ-----QQQQQQQQQQQQQQQQQTNPIPVTQPTDSY 47

**** *** *** *

Rsc6 -------------------------------------------MVTQTNPVPVTYPTDAY 17

Snf12 IPDHLA-ELIPELYSFQQLVDSEKRLDHFIHLRNLHMKRMVAQWERSKLSQEFLYPHLNF 119

** * ***** * * * * * ** **

Sk IPPFLP-QLIPELNSYEKLCEAERKIDVYLSRKKIDLHQSVSQWNNSKT------TSVEI 100

** ** * ** * * ** * * * .

Rsc6 IPTYLPDDKVSNLADLKKLIEMDSRLDLYLTRRRLDTSINLPTNTKTKD---------HP 68

Snf12 PNVKFLRIFISNVSENQPWQMDTNNEADLMALENATWTMRIEGRLLDNVQANDPAREKFS 179

** * ** ****** * ** ** ****** ** * **** ***

Sk ASKRYLRVFVSNIAENQPWQVNDSNSSDLES----SWTLRIEGRLIDNQDAQDPARPKFS 156

* ** * * * * ******* * **

Rsc6 PNKEMLRIYVYNTTESSPRSDSGTPADSGKT----TWTLRIEGKLLHESAN---GKHPFS 121

Snf12 SFIESIVVDFKNKENDNVPSTKFNAAPEENATEGPSDKKLNLNLPLQFSLPNGDNSTTTN 239

** * **** * * ** *

Sk SFLSGIAVDFKKADT--------------NGQQGLAE------LPVPVPAP--------- 187

** * ***** **

Rsc6 EFLEGVAVDFKRLKP--------------LGMGKKRKRDSSLSLPLNLQQPEYNDQDSTM 167

Snf12 TDQNNATMGEETAKKDMSSTTPKLESVKWQYDPNNPVDFDGLDIKRVGSENVECTISILR 299

* * *** ** ***** ** * *** *** *

Sk ----------------IPVPQLEPKVVEWHSDPNTPVEFDGLDVKRTGTENVPCTITIQP 231

** * * ***** * ** * * * ****

Rsc6 GDNDN---GEDEDSAEAESREEIVDALEWNYDENNVVEFDGIDIKRQGKDNLRCSITIQL 224

Snf12 KSSPEEPFMSYSPQLTAIIGLKSGTSHDAIFSIYKYIHLNELLTNDESAFENLM-----G 354

* **** *** ** *** * **** ** ** **

Sk KGFTG-SLLQFSPQLSTIIGISKGTLHDAVYSLYKYILLNDLLVNDS------------- 277

* * * ** * * ** * ***** ***** * * *

Rsc6 RGVDG-GKVQYSPNLATLIGMQTGSVNDAVYSIYKYILINNLFVTEQTEAQDGSNDAEDS 283

Snf12 NRNNHNSNTSTSKMLDAASSQVSIVKLDTQLITLLPSSLKESSPDTMKLTDLLSLINSTH 414

*** * * * * * * * * *** * *

Sk TNDATPANTSSS----STNGEKTIIKIDYMLAALFSE-----SRDKMKLAEIPHVVN-AH 327

* * * * **

Rsc6 SNENNNKNGAGDDDGVEGSTPKDKPELGEVKLDSLLQKVLDTNAAHLPLMNVVQTVN-KL 342

Snf12 LLPLQPIEIDYTVRVDKASTYGELVLDIEVPDVNALKFNNTQRESQIGAAELNENARELE 474

* * * *************** * *** * * * * *

Sk ISPIPPVKIEYTVRVDKASTYGELVFDLEVP--SAVMPQPLNPVAQQGMNLLTEFNQIST 385

** ** ** * *** * * *

Rsc6 VSPLPPIILDYTIDLSKDTTYGATTLDVDVS-------------HILHQPQPQPNLQKEE 389

Snf12 QIKPKIALQDKEITSVLSNLHESNKRYRFFKKISEDPVKALNECIASTSNALKVLSGDEG 534

* * * * * ** * *** * * * * ******* ****

Sk DSEPQFQALSKKLNILQLQLNASANKYQFFSKLADDPVPVLQEYIQSSSNALKVLGGDEG 445

* * **** ** ***** * * * * ** ** **

Rsc6 ETDAEDTAKLREITKLALQLNSSAQKYQFFHELSLHPRETLTHYLWSSKQNELVLQGDQY 449

Snf12 YNEDMVRRANFYKEN--EAMLRENIEVILSNGRM 566

*** *** ** * **** ** * *****

Sk FNEDTVRRSSFYEQN--EAMLFENLSVLLSNGRI 477

** * * * * * * * * * * **

Rsc6 FNEDAARTSDIYSNNNNDRSLMGNISLLYSQGRL 483

Rnr2 MP---KETPSKAAADALSDLEIKDSKSNLNKELETLREENRVKSDMLKEKLSKDAENHKA 57

* ********* ****** **** ** * *** * ** * *

Sk MANPVKETPSKAAANALSDLELKDSKANLIKQLETVKEAAAADAEETEARLSRAAIEHRN 60

*

Rnr4 ------------------------------------------------------MEAHNQ 6

Rnr2 YLKSHQVHRHKLKEMEKEEPLLNEDKERTVLFPIKYHEIWQAYKRAEASFWTAEEIDLSK 117

**** **** *** * ***** * * * *******************************

Sk FLKSHAVHRHQLKEVEREEPLLVENKRRFVLFPIKYHEIWQAYKRAEASFWTAEEIDLSK 120

*** ** ** * * ** ** **** ********* *** ********** * *

Rnr4 FLKTFQKERHDMKEAEKDEILLMENSRRFVMFPIKYHEIWAAYKKVEASFWTAEEIELAK 66

Rnr2 DIHDWNNRMNENERFFISRVLAFFAASDGIVNENLVENFSTEVQIPEAKSFYGFQIMIEN 177

**************************************** ******** ******* **

Sk DIHDWNNRMNENERFFISRVLAFFAASDGIVNENLVENFSAEVQIPEAKCFYGFQIMMEN 180

* * * ** ** ** * ***** * ** * **********

Rnr4 DTEDFQ-KLTDDQKTYIGNLLALSISSDNLVNKYLIENFSAQLQNPEGKSFYGFQIMMEN 125

Rnr2 IHSETYSLLIDTYIKDPKESEFLFNAIHTIPEIGEKAEWALRWIQDADALFGERLVAFAS 237

*************************** *** * ****** ***** *** *******

Sk IHSETYSLLIDTYIKDPKESEFLFNAIETIPQIKEKAEWAIRWIQDEEALFAERLVAFAA 240

* ** ** * **** ** * * * ** *** * *********

Rnr4 IYSEVYSMMVDAFFKDPK-NIPLFKEIANLPEVKHKAAFIERWISNDDSLYAERLVAFAA 184

Rnr2 IEGVFFSGSFASIFWLKKRGMMPGLTFSNELICRDEGLHTDFACLLFAHLKNKPDPAIVE 297

*********** ****** * *********************************** ***

Sk IEGVFFSGSFAAIFWLKKKGLMPGLTFSNELICRDEGLHTDFACLLFAHLKNKPDPKIVE 300

** * * * *** * **** * **** * *** ******* ** *** *

Rnr4 KEGIFQAGNYASMFWLTDKKIMPGLAMANRNICRDRGAYTDFSCLLFAHLRTKPNPKIIE 244

Rnr2 KIVTEAVEIEQRYFLDALPVALLGMNADLMNQYVEFVADRLLVAFGNKKYYKVENPFDFM 357

* **** ** *** ***** *********************** ** *** * ******

Sk RIITEAVSIEKRYFDDALPVSLLGMNADLMNQYVEFVADRLLVALGNQKYYNVTNPFDFM 360

****** *** * *** ** * ***** ** ** **** *** **

Rnr4 KIITEAVEIEKEYYSNSLPVEKFGMDLKSIHTYIEFVADGLLQGFGNEKYYNAVNPFEFM 304

Rnr2 ENISLAGKTNFFEKRVSDYQKAGVMSKS--TKQEAGAFTFNEDF 399

************************ ** * ******* ***

Sk ENISLAGKTNFFEKRVSDYQKAGVIAKSNKTESEAGAFTFDEDF 404

* **** **** ******* ** * * ** **

Rnr4 EDVATAGKTTFFEKKVSDYQKASDMSKS-ATPSKE--INFDDDF 345

Hbs1 ---------------MAYSDYSDGADDM------PDFHDEGEFDDYLNDDEYDLMNEVFP

*** * * ** ******** ** *** **

Sk ------------------MAKYYDEDDMDYHSDVPEFQDESEFDDYLNDEEYGLMNDMFP

* * *

Ski7 MSLLEQLARKRIEKSKGLLSADQSHSTSKSASLLERLHKNRETKDNNAETKRKDLKTLLA

Hbs1 TLKAQLQDYQGWD---NLSLKLALFDNNFDLESTLAELKKTLKKKKTPKK----------

* ***** ** *** ** *** *** **

Sk RAKKEMADYQGWN---NLAVKLAIFDQNFDFNQAMIELKRIYRKKQFAQPKQEAAKK---

* * * ** * *

Ski7 KDKVKRSDFTPNQHSVSLSLKLSALKKSNSDLEKQGKSVTLDSKENELPTKRKSPDDKLN

Hbs1 ------------------------------------------------------------

Sk ------------------------------------------------------------

Ski7 LEESWKAIKEMNHYCFLKNDPCINQTDDFAFTNFIIKDKKNSLSTSIPLSSQNSSFLSLK

Hbs1 -----PIAAANGSANVTQKLANISISQQRPNDRLPDWLDEEESEGERNGEEANDE-KTVQ

*

Sk ---------------------QAISNFNKPSPDDVVLTAQKKAFTDVEKVANEVSKLSVN

** *** ***** ** ** * *

Ski7 KHNNELLGIFVPCNLPKTTRKVAIENFNRPSPDDIIQSAQLNAFNEKLENLNIKSVPKAE

Hbs1 ---------------------------RYYKTTVPTKPKKPHDISAFVKSALPHLSFVVL

* * * **** * ** * * *** ****

Sk GGSDQDIDIESEESDDDRKPKAEPVTKTYKKITTPTKPRNPVDIQSYVSSRKPHLNFVVL

* * * ** * * *

Ski7 ---------------------------KKEPINLQTPPTESIDIHSFIATHPLNLTCLFL

Hbs1 GHVDAGKSTLMGRLLYDLNIVNQSQLRKLQRESETMGK-SSFKFAWIMDQTNEERERGVT

***************** ** *** *** ** ** ** **** *** ****

Sk GHVDAGKSTLMGRLLYDVGAVNYKLIRKLKKESEQAGK-GSFHLAWVMDQTSEERDRGVT

* ***** * **** * * * * * * * ** *

Ski7 GDTNAGKSTLLGHLLYDLNEISMSSMRELQKKSSNLDPSSSNSFKVILDNTKTERENGFS

Hbs1 VSICTSHFSTHRAN----FTIVDAPGHRDFVPNAIMG---ISQADMAILCVDCSTNAFES

* **** * * *** ************* * ***** * * ** ****

Sk VDICTSDFETDRAT----FTIIDAPGHRDFVPNAITG---ISQADAAVLTIDCCVDAFES

* * ** ** ** *** * *

Ski7 MFKKVIQVENDLLPPSSTLTLIDTPGSIKYFNKETLNSILTFDPEVYVLVIDCNYDSWEK

Hbs1 GFDLDG--QTKEHMLLASSLG------IHNLIIAMNKMDNVDWSQQRFEEIKSKLLPYLV

** *** ***** *** *** ****** * ** ** *

Sk GFSLDG--QTKEHTLLARSLG------ARHIVVAMNKMDHEGWYPTRFFDIKWELESFFK

**** * * * ** * * * * * *

Ski7 --SLDGPNNQIYEILKVISYLNKNSACKKHLIILLNKADLISWDKHRLEMIQSELNYVLK

Hbs1 D-IGFFEDNINWVPISGFSGEGVYKIEYT------------DEVRQWYNGPNLMSTLENA

* ** ** ** ****** *** * * **

Sk D-IGIKKEQVSWVTCSGLSGEGVYNIKRP-------------LGIDWYNDPSLVDCLEDV

**** * ** * *

Ski7 ENFQWTDAEFQFIPCSGLLGSNLNKTENITKSKYKSEFDSINYVPEWYEGPTFFSQLYLL

Hbs1 AAFKISKENEGINKDDPFLFSVLEIIPSK-KTSNDLALVSGKLE--SGSIQPGESLTIYP

**** * **** * * * **** * ******* ****

Sk AAKKLNKDESSEAIEANFLFSILDVSPTS-KNNEV--IVSGKVE--AGSIQPGETITIYP

* * ** * ** ** * ** * ** *

Ski7 VVEHNMNKIE-TTLEEPFVGTILQSSVLQPIAEIN--YVSLKVLINSGYIQSGQTIEIHT

Hbs1 SEQSCIVDKIQVGSQQGQ----STNHEETDVAIKGDFVTLKLRKAYPEDIQNGDLAASVD

**** *** * * **** **** ** **** ****

Sk SEQSVLVDSILSGN----------DRASVKIGVAGDFVMLKLREAYYEDIQSGDLATTVG

* * * **

Ski7 QYEDFHYYGIVSRMKNSKQILETNTKNNISVGLNPDILEVLVKIHNTEDFTKKQFHIRKG

Hbs1 YSSIHSAQCFVLELTTFDMNRPLLPGTPFILFIGVKEQPARIKRLISFIDKGN--TASKK

* ** * * ** ******* * * * ******* * * * *

Sk N-DIPTAQEFTAQLLTFKLDRPLLPGTSFMLFRGGCEQPARIKKLVSIVCKKDPKKILKK

* ** * *

Ski7 D-IIIHSRKTNTLSPNLPNTLKLLALRLIKLSIQTHALSDPVDLGSELLLYHNLTHNAVK

Hbs1 KIRHLGSKQRAFVEIELIEVKRWIPLLTAHENDRLGRVVLRKDGRTIAAGKISEITQ----

* **** * * ******* ** ** ** *** **** *** ***

Sk KVKHLGSDQAAIVEIELIEKKRRIPILTIEKSKHLGRIVLRKEGRTVAAGVVESLDF----

** ** * * * *

Ski7 LVKILGTNDISINPNQSLIVEVEIIEPDFALNVIDSKYITNNIVLTSIDHKVIAVGRIACQ
